# Supplementary material for: Static and dynamic functional connectomes represent largely similar information
Source: PubMed Central journal article supplement — bioRxiv. 2023 May 16:2023.01.24.525348. Originally published 2023 Jan 24. Preprint. [Version 2] doi: 10.1101/2023.01.24.525348 (PMC9900764; doi:10.1101/2023.01.24.525348), 2023-05-16
Supplement: NIHPP2023.01.24.525348v1-supplement-1.pdf [file NIHPP2023.01.24.525348v1-supplement-1.pdf]

622 **11. Supplement**

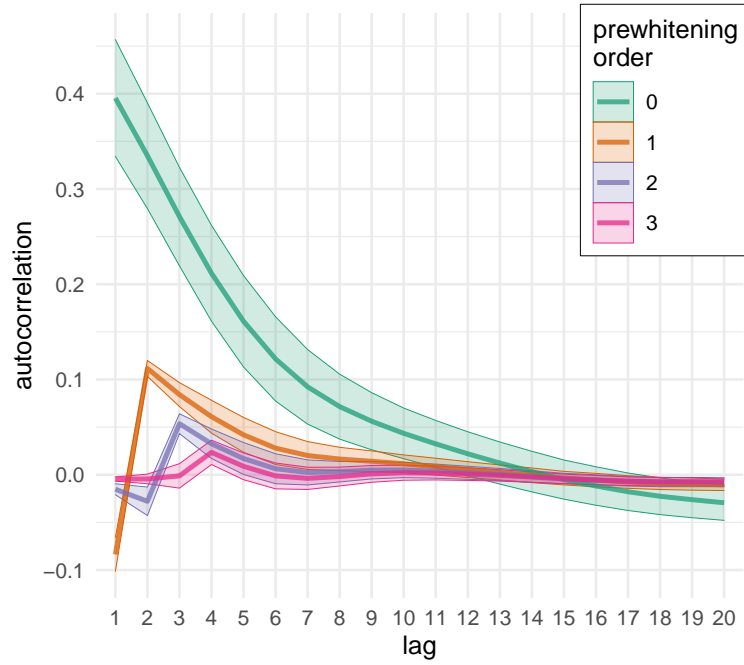

Figure S1: **Autocorrelation function of experimental data as a function of prewhitening order.** The mean autocorrelation function was computed over all participants and regions; the ribbons represent the standard deviation. Prewhitening drastically reduced autocorrelation even at low orders. Interestingly, prewhitening at orders 1 and 2 reversed the sign of autocorrelation in low lags.

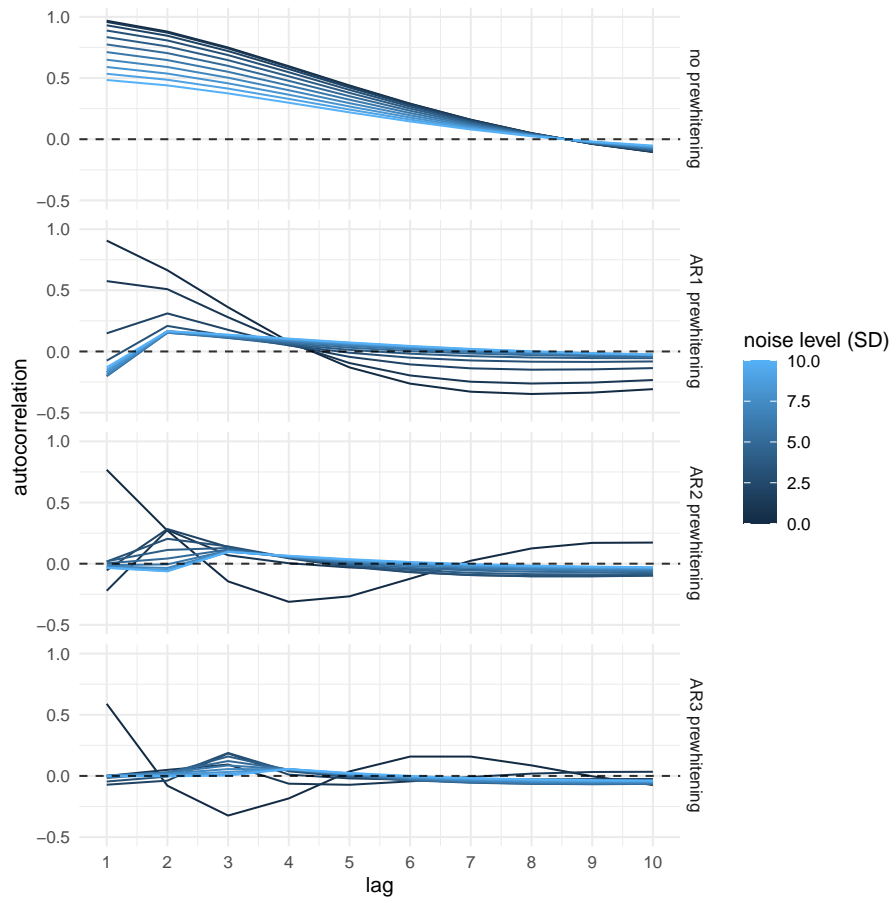

Figure S2: **The autocorrelation function of simulated data as a function of prewhitening order and noise.** The mean autocorrelation function was computed over all participants and regions. In general, noise and prewhitening reduced absolute autocorrelation. The shape of the autocorrelation function varied as a function of noise and prewhitening. In case without prewhitening, autocorrelation monotonically decreased and reached 0 at lag 8. After prewhitening, autocorrelation varied between positive and negative values, and this was most pronounced in cases without noise. The autocorrelation function was more similar to the experimental data in cases with low levels of noise.

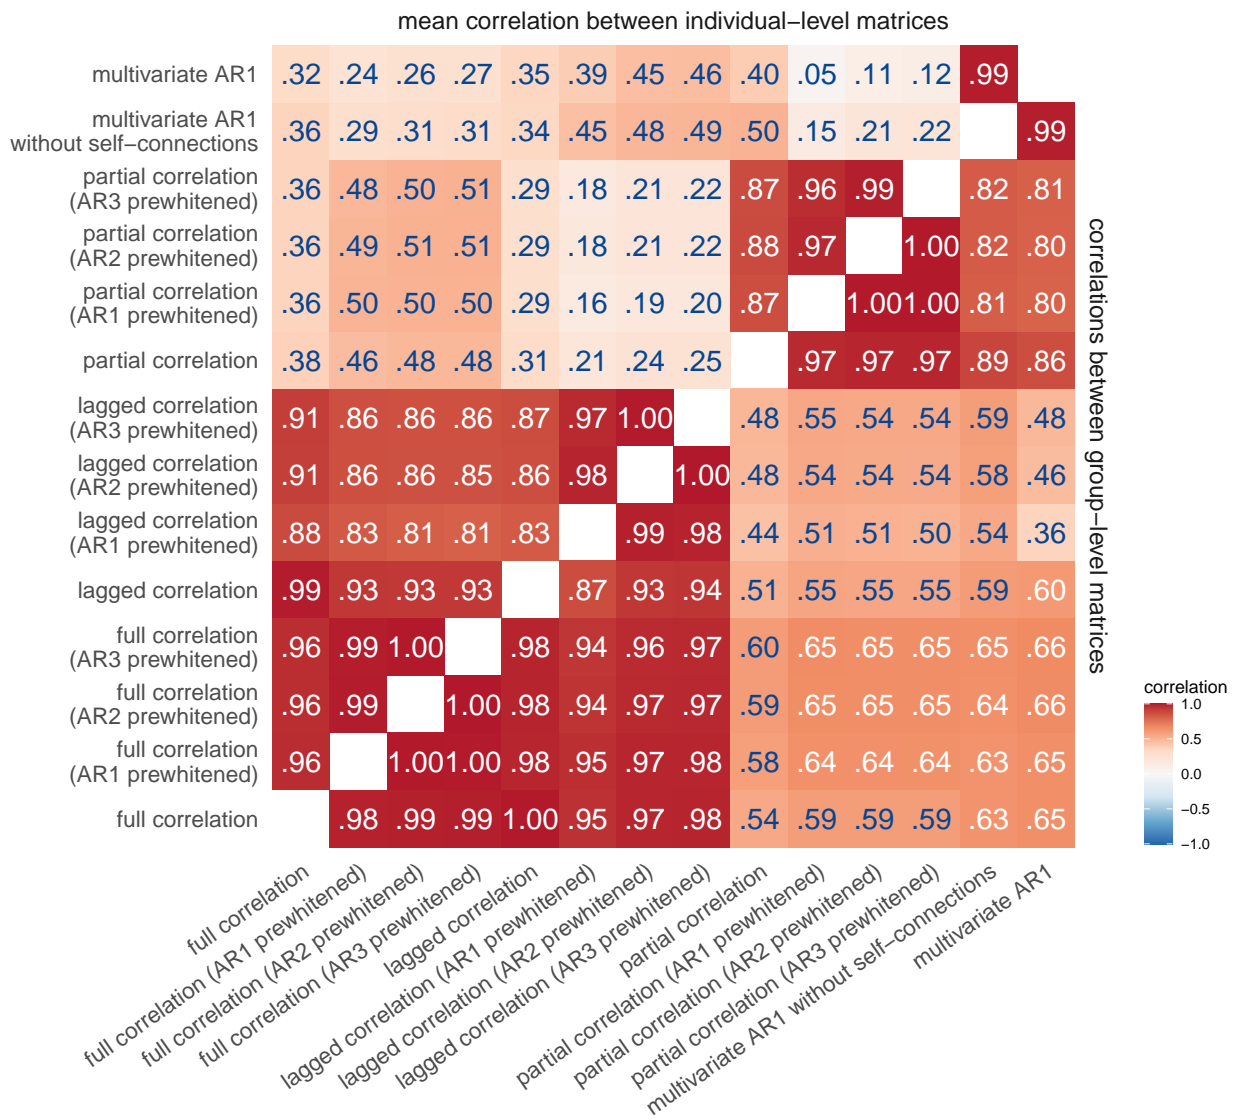

Figure S3: **Correlations between connectivity methods.** Same as in Figure 2 but includes all orders of prewhitening.

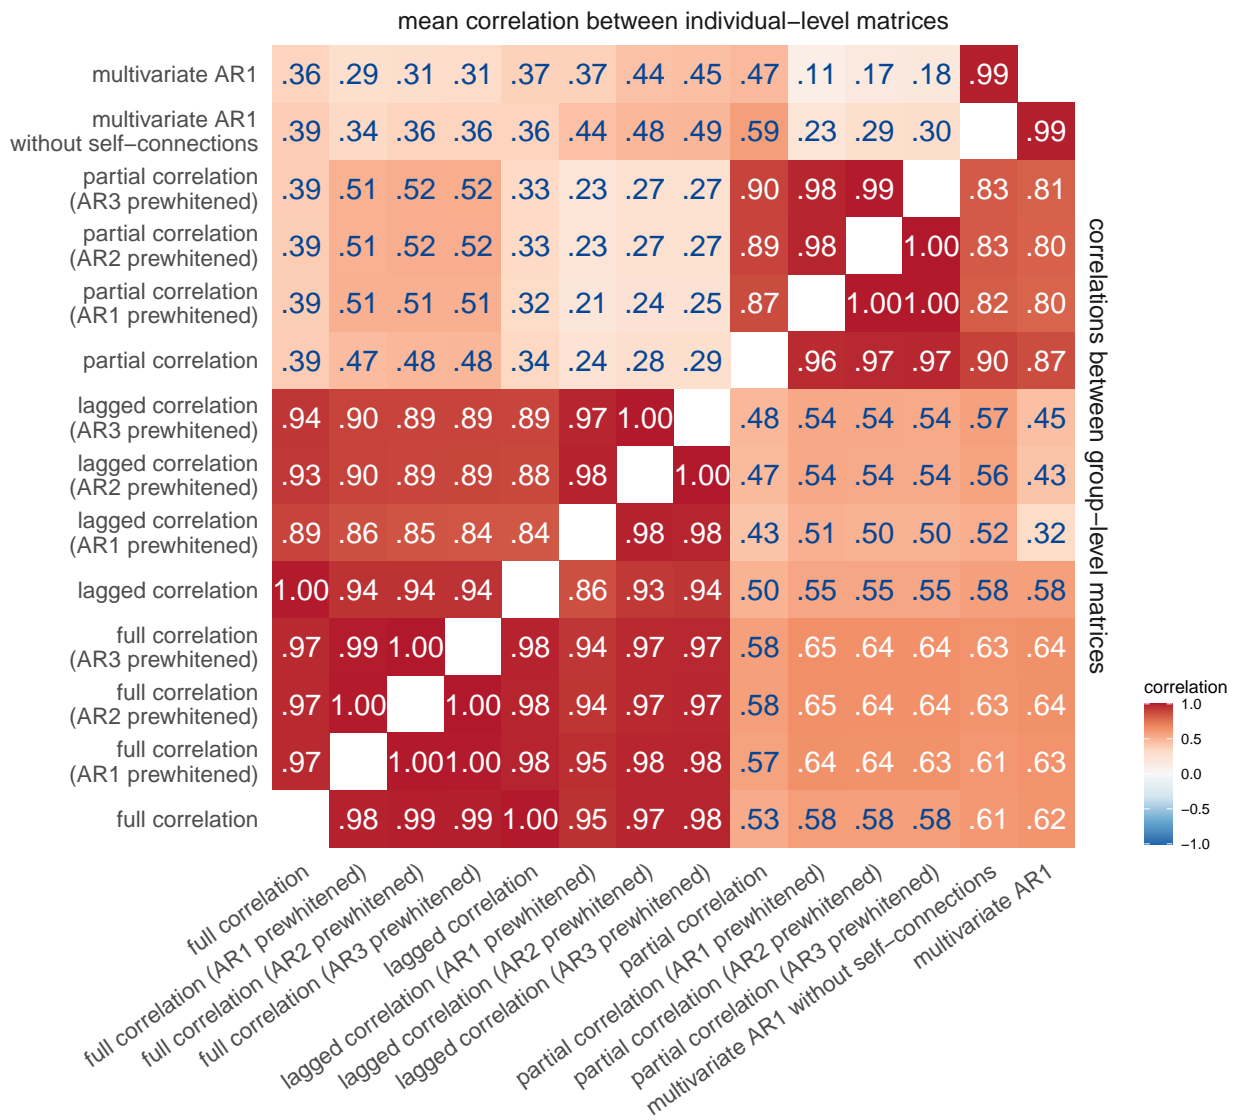

Figure S4: Correlations between connectivity methods on 200 participants with highest quality data.

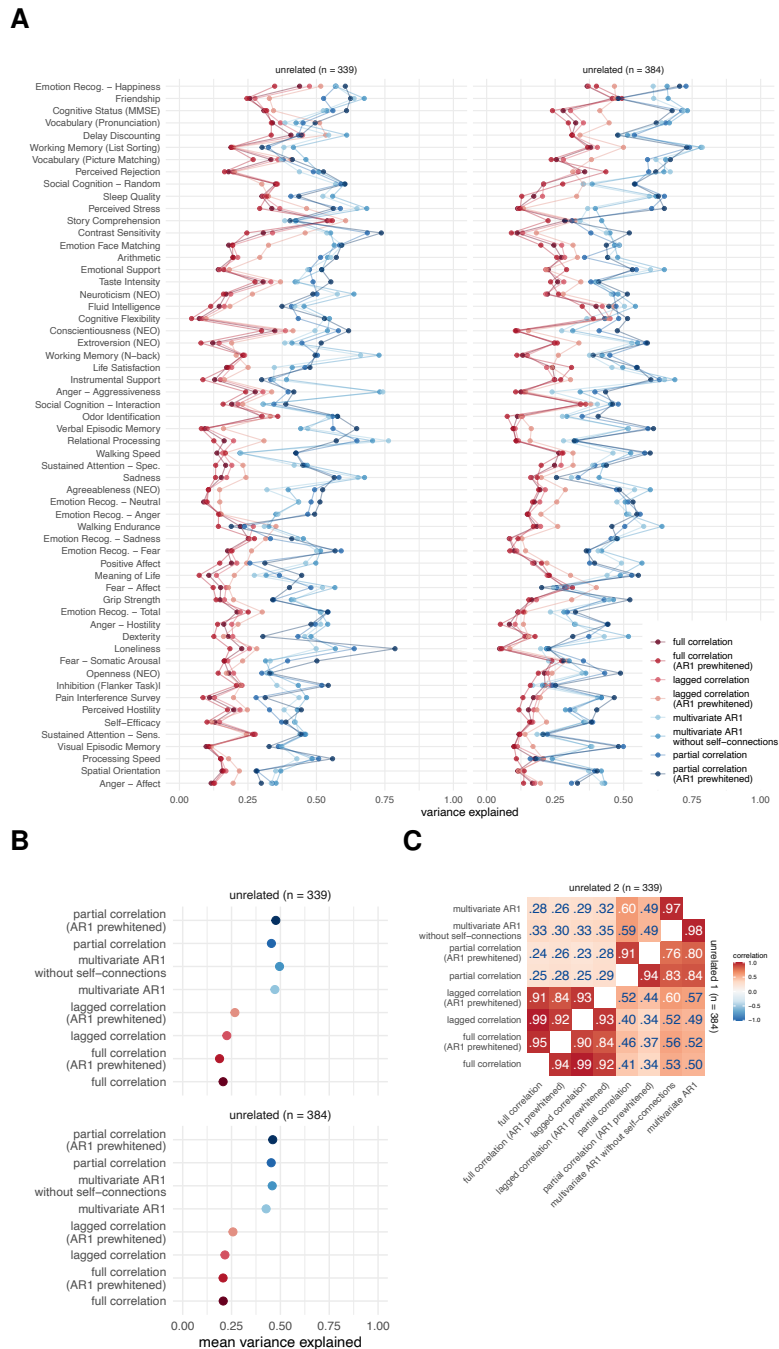

Figure S5: Results of variance component model for brain-behavior associations on subsamples of unrelated participants. (A) Variance explained for individual traits estimated with different connectivity methods, (B) mean variance explained, and (C) similarities of explained variance patterns between connectivity methods. The traits are ordered according to the mean variance explained across connectivity methods. The same as in Figure 4 but in subsamples of unrelated participants.

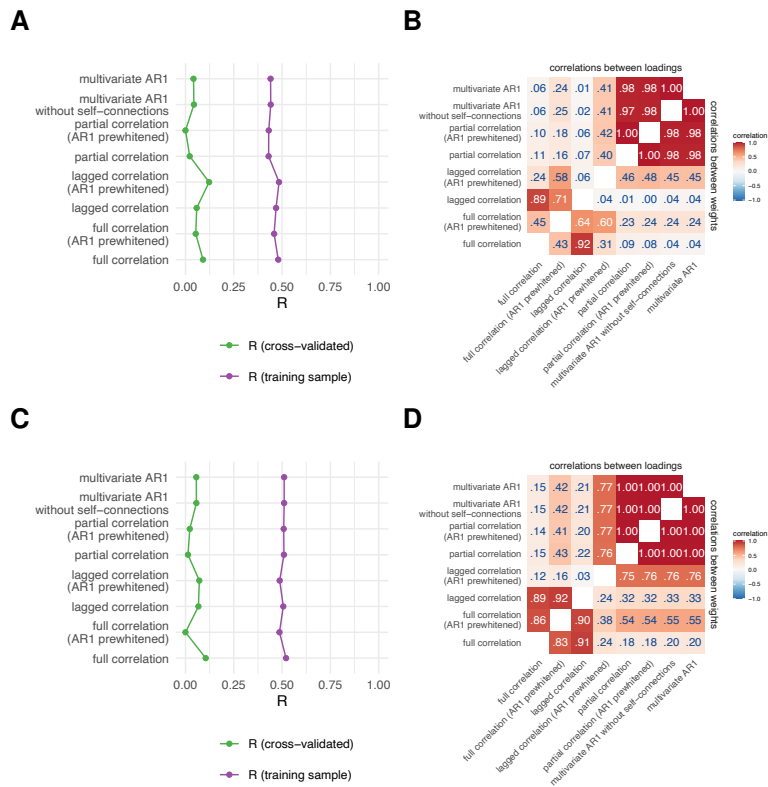

Figure S6: **Results of canonical correlation analysis for brain-behavior associations on subsamples of unrelated participants.** (A,C) First canonical correlation on test and training set in the first (A,  $n = 384$ ) and second subsample (C,  $n = 339$ ). (B,D) Correlations between canonical loadings and weights across FC methods for the first canonical components on the first (B) and second (D) subsample.

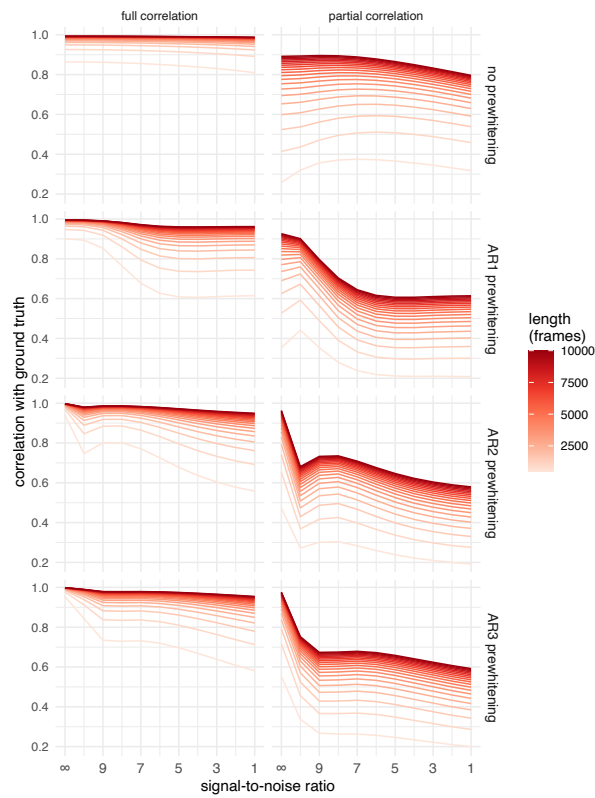

Figure S7: **Correlation between ground truth and simulated data for all FC methods in association with noise and signal length.** Same as in Figure 7B but includes all orders of prewhitening.

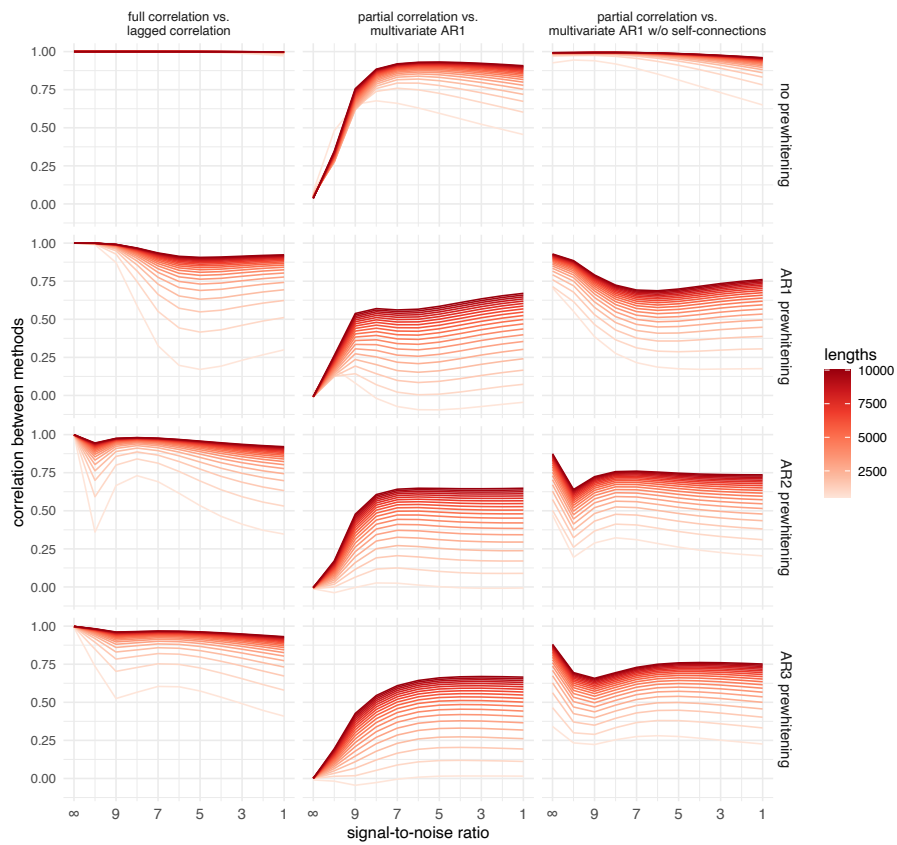

Figure S8: Correlation between selected pairs of FC methods as a function of noise and signal length on simulated data. Same as in Figure 7C but includes all prewhitening orders.



| HCP Field                                | Friendly Name                  | HCP Field        | Friendly Name              |
|------------------------------------------|--------------------------------|------------------|----------------------------|
| PicSeq_Unadj                             | Visual Episodic Memory         | WM_Task_Acc      | Working Memory (N-back)    |
| CardSort_Unadj                           | Cognitive Flexibility          | NEOFAC_A         | Agreeableness (NEO)        |
| Flanker_Unadj                            | Inhibition (Flanker Task)      | NEOFAC_O         | Openness (NEO)             |
| PMAT24_A_CR                              | Fluid Intelligence             | NEOFAC_C         | Conscientiousness (NEO)    |
| ReadEng_Unadj                            | Vocabulary (Pronunciation)     | NEOFAC_N         | Neuroticism (NEO)          |
| PicVocab_Unadj                           | Vocabulary (Picture Matching)  | NEOFAC_E         | Extroversion (NEO)         |
| ProcSpeed_Unadj                          | Processing Speed               | ER40_CR          | Emotion Recog. - Total     |
| DDisc_AUC_40K                            | Delay Discounting              | ER40ANG          | Emotion Recog. - Anger     |
| VSPLIT_TC                                | Spatial Orientation            | ER40FEAR         | Emotion Recog. - Fear      |
| SCPT_SEN                                 | Sustained Attention - Sens.    | ER40HAP          | Emotion Recog. - Happiness |
| SCPT_SPEC                                | Sustained Attention - Spec.    | ER40NOE          | Emotion Recog. - Neutral   |
| IWRD_TOT                                 | Verbal Episodic Memory         | ER40SAD          | Emotion Recog. - Sadness   |
| ListSort_Unadj                           | Working Memory (List Sorting)  | AngAffect_Unadj  | Anger - Affect             |
| MMSE_Score                               | Cognitive Status (MMSE)        | AngHostil_Unadj  | Anger - Hostility          |
| PSQI_Score                               | Sleep Quality                  | AngAggr_Unadj    | Anger - Aggressiveness     |
| Endurance_Unadj                          | Walking Endurance              | FearAffect_Unadj | Fear - Affect              |
| GaitSpeed_Comp                           | Walking Speed                  | FearSomat_Unadj  | Fear - Somatic Arousal     |
| Dexterity_Unadj                          | Dexterity                      | Sadness_Unadj    | Sadness                    |
| Strength_Unadj                           | Grip Strength                  | LifeSatisf_Unadj | Life Satisfaction          |
| Odor_Unadj                               | Odor Identification            | MeanPurp_Unadj   | Meaning of Life            |
| PainInterf_Tscore                        | Pain Interference Survey       | PosAffect_Unadj  | Positive Affect            |
| Taste_Unadj                              | Taste Intensity                | Friendship_Unadj | Friendship                 |
| Mars_Final                               | Contrast Sensitivity           | Loneliness_Unadj | Loneliness                 |
| Emotion_Task_Face_Acc                    | Emotion Face Matching          | PercHostil_Unadj | Perceived Hostility        |
| Language_Task_Math_Avg_Difficulty_Level  | Arithmetic                     | PercReject_Unadj | Perceived Rejection        |
| Language_Task_Story_Avg_Difficulty_Level | Story Comprehension            | EmotSupp_Unadj   | Emotional Support          |
| Relational_Task_Acc                      | Relational Processing          | InstruSupp_Unadj | Instrumental Support       |
| Social_Task_Perc_Random                  | Social Cognition - Random      | PercStress_Unadj | Perceived Stress           |
| Social_Task_Perc_TOM                     | Social Cognition - Interaction | SelfEff_Unadj    | Self-Efficacy              |

Table S1: Behavioral measures.
